# Supplementary material for: Control of Signaling in a MAP-kinase Pathway by an RNA-Binding Protein
Source: PubMed Central journal article supplement (PMC1803019; doi:10.1371/journal.pone.0000249), 2007-02-28

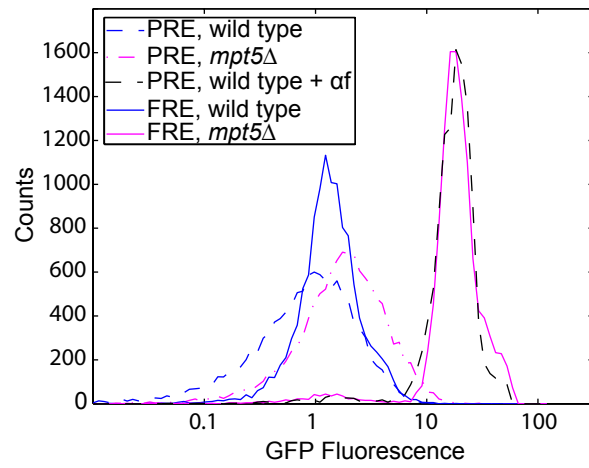

Supplement: pone.0000249.s004.pdf [file pone.0000249.s004.pdf]
